# Supplementary material for: Terminal hairpin in oligonucleotide dominantly prioritizes intramolecular cyclization by T4 ligase over intermolecular polymerization: an exclusive methodology for producing ssDNA rings
Source: PubMed Central journal article supplement (PMC6294566; doi:10.1093/nar/gky769), 2018-08-29
Supplement: gky769_supplemental_files.pdf [file gky769_supplemental_files.pdf]

# **Terminal hairpin in oligonucleotide dominantly prioritizes intramolecular cyclization by T4 ligase over intermolecular polymerization – An exclusive methodology for producing ssDNA rings**

Yixiao Cui<sup>1,†</sup>, Xutiange Han<sup>1,†</sup>, Ran An<sup>1,2,\*</sup>, Yaping Zhang<sup>1</sup>, Kai Cheng<sup>1</sup>, Xingguo Liang<sup>1,2,\*</sup> and Makoto Komiyama<sup>1</sup>

1 College of Food Science and Engineering, Ocean University of China, Qingdao 266003, China

2 Laboratory for Marine Drugs and Bioproducts, Qingdao National Laboratory for Marine Science and Technology, Qingdao 266003, China

\*To whom correspondence should be addressed. Tel: +86 532 82031086; Fax: +86 532 82031086; Email: liangxg@ouc.edu.cn

Correspondence may also be addressed to Ran An. Tel: +86 532 82031318; Fax: +86 532 82031086; Email: ar@ouc.edu.cn

†These authors contributed equally to this work as first authors.

**Table S1.** The I-DNAs and splints used in Figures 2-7.

| Name                         | Sequences (5'→3') *                                                                          | Length (nt) |
|------------------------------|----------------------------------------------------------------------------------------------|-------------|
| L64 <sub>3-4,24-4</sub>      | <u>ACCGCT</u> TACTTGCCAGCGCCCTAGCGCCCGCTCCTTTCG<br>CTTTCTTCTCCCCATTTT <u>CGCCGG</u>          | 64          |
| L64 <sub>16-4,37-4</sub>     | <u>CCATTT</u> TCGCCGGACCGCTACTTGCCAGCGCCCTAGCG<br>CCCGCTCCTTTCGCTTTCTTCTCC                   | 64          |
| L64 <sub>3-4</sub>           | <u>ACCGCT</u> TACTTGCCAGCGCCCTTTTCCCTTTCTTTTCGCT<br>TTCTTCTCCCCATTTT <u>CGCCGG</u>           | 64          |
| L74 <sub>3-4,24-4,65-2</sub> | <u>ACCGCT</u> TACTTGCCAGCGCCCTAGCGCCCGCTCCTTTCG<br>CTTTCTTCCCTTCTTTCTCGCCACGTT <u>CGCCGG</u> | 74          |
| L64 <sub>3-4,24-4,55-2</sub> | <u>ACCGCT</u> TACTTGCCAGCGCCCTAGCGCCCGCTCCTTTCG<br>CTTTCTTCTCGCCACGTT <u>CGCCGG</u>          | 64          |
| L54 <sub>3-4,24-4,45-2</sub> | <u>ACCGCT</u> TACTTGCCAGCGCCCTAGCGCCCGCTCCTTTCG<br>CTTTCTTCTCGCCACGTT <u>CGCCGG</u>          | 54          |
| L44 <sub>14-6,35-2</sub>     | <u>ACCGCT</u> TACTTGCCAGCGCCCTAGCGCCGCTTTCGTT <u>CG</u><br><u>CCGG</u>                       | 44          |
| L34 <sub>3-4,25-2</sub>      | <u>ACCGCT</u> TACTTGCCAGCGCGCCACGTT <u>CGCCGG</u>                                            | 34          |
| L64 <sub>2-4,23-4,51-2</sub> | <u>CCGCT</u> TACTTGCCAGCGCCCTAGCGCCCGCTCCTTTTCGC<br>TTTCTTCTCCCCATTTT <u>CGCCGGA</u>         | 64          |
| L64 <sub>4-4,25-4</sub>      | <u>GACCGC</u> TACTTGCCAGCGCCCTAGCGCCCGCTCCTTTTC<br>GCTTTCTTCTCCCCATTTT <u>CGCCGG</u>         | 64          |
| L64 <sub>5-4,26-4</sub>      | <u>GGACCG</u> TACTTGCCAGCGCCCTAGCGCCCGCTCCTTTTC<br>CGCTTTCTTCTCCCCATTTT <u>CGCC</u>          | 64          |
| L64 <sub>1-4,24-4</sub>      | <u>CGCT</u> TACTTGCCAGCGCCCTAGCGCCCGCTCCTTTTCGC<br>CTTTCTTCTCCCCATTTT <u>CGCCGG</u>          | 64          |
| L64 <sub>1-6,24-4</sub>      | <u>GGCGC</u> TACTTGCCAGCGCCCTAGCGCCCGCTCCTTTTCGC<br>CTTTCTTCTCCCCATTTT <u>CGCCGG</u>         | 64          |
| L64 <sub>1-7,24-4</sub>      | <u>GGCGCG</u> CACTTGGCGCGCCCTAGCGCCCGCTCCTTTTCGC<br>CTTTCTTCTCCCCATTTT <u>CGCCGG</u>         | 64          |
| L60 <sub>1-7,20-4</sub>      | <u>GGCGCG</u> GAAGCGCGCCCTAGCGCCCGCTCCTTTTCGCTTT<br>CTTCTCCCCATTTT <u>CGCCGG</u>             | 60          |
| L64 <sub>6-4,27-4</sub>      | <u>CGGACC</u> GCTACTTGCCAGCGCCCTAGCGCCCGCTCCTTT<br>TCGCTTTCTTCTCCCCATTTT <u>CGC</u>          | 64          |
| Splint <sub>3-4</sub>        | AGCGGTCCGGCG                                                                                 | 12          |
| Splint <sub>16-4</sub>       | AAATGGGGAGAA                                                                                 | 12          |
| Splint <sub>2-4</sub>        | TAGCGGTCCGGC                                                                                 | 12          |
| Splint <sub>4-4</sub>        | GCGGTCCGGCGA                                                                                 | 12          |
| Splint <sub>5-4</sub>        | CGGTCCGGCGAA                                                                                 | 12          |
| Splint <sub>1-4</sub>        | GTAGCGCCGGCG                                                                                 | 12          |
| Splint <sub>1-6</sub>        | AGCGCCCCGGCG                                                                                 | 12          |
| Splint <sub>1-7</sub>        | CGCGCCCCGGCG                                                                                 | 12          |
| Splint <sub>6-4</sub>        | GGTCCGGCGAAA                                                                                 | 12          |

\*The underlined parts ("\_") of I-DNA are complementary with splint.

**Table S2.** The percentage of I-DNAs with stable hairpin(s) calculated by Mfold

| The length of I-DNA*                                        | 50 nt       |             | 100 nt      |             |
|-------------------------------------------------------------|-------------|-------------|-------------|-------------|
| Hairpin quantity                                            | One or more | two or more | one or more | two or more |
| Percentage with stable hairpin ( $T_m > 50^\circ\text{C}$ ) | 39%         | 6%          | 69%         | 14%         |

\*Human genome (ADAM) is used as the source of sequences, and the number of used I-DNA sequences for checking secondary structures is 100. Only the hairpin with a  $T_m$  higher than  $50^\circ\text{C}$  was counted. Percentage with stable hairpin means the percentage of I-DNAs with stable hairpin(s) in all the I-DNA we tested.

The conditions:  $[\text{Mg}^{2+}] = 10 \text{ mM}$  and  $25^\circ\text{C}$ .

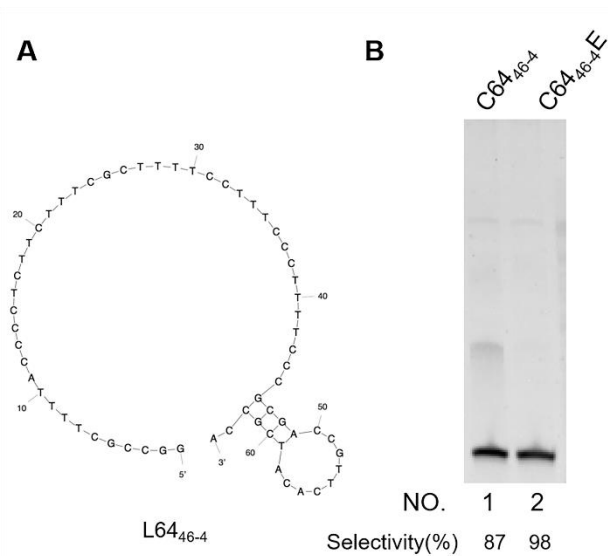

**Figure S1.** Effects of hairpins on the cyclization of I-DNA. In (A), the solution structures of L64<sub>46-4</sub> determined by Mfold calculation are shown. In (B), these I-DNAs were cyclized by T4 DNA ligase. Lane 1, L64<sub>46-4</sub> treated with T4 DNA ligase in the presence of 12-nt splint; lane 2, the products in lane 1 treated with Exonuclease I to remove non-cyclic products. The conditions: [L64<sub>46-4</sub>]= 5  $\mu$ M, [Splint<sub>46-4</sub>]= 10  $\mu$ M, and 10 U T4 DNA ligase in 1 $\times$  T4 DNA ligase buffer at 25°C for 12 h.

Sequences of oligonucleotides used here are as follows:

L64<sub>46-4</sub>: GGCCGCTTTTACCCCTCTTCTTTTCGCTTTTCCTTTCCCTTTTCCCGCGACCGTTCACATCGCCA

Splint<sub>46-4</sub>: GCGGCCTGGCGA

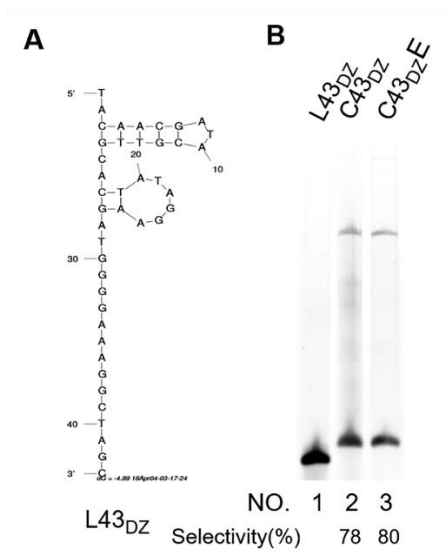

**Figure S2.** Cyclization of a 10-23 DNAzyme (L43<sub>DZ</sub>). (A) The solution structures of L43<sub>DZ</sub> determined by Mfold calculation under the conditions of [Mg<sup>2+</sup>] = 10 mM and 25°C. (B) Treatments of L43<sub>DZ</sub> with T4 DNA ligase. Lane 1, L43<sub>DZ</sub> without the T4 ligase treatment; lane 2, L43<sub>DZ</sub> treated with T4 DNA ligase in the presence of 12-nt splint; lane 3, the products in lane 2 treated with Exonuclease I. The conditions for the cyclization: [L43<sub>DZ</sub>]<sub>0</sub> = 5 μM, [Splint<sub>DZ</sub>]<sub>0</sub> = 10 μM, and 10 U T4 DNA ligase in 1× T4 DNA ligase buffer at 25°C for 12 h.

Sequences of oligonucleotides used here are as follows:

L43<sub>DZ</sub>: TACAACGATACGTTGCACTATAGGAAGATGGGGAAAGGCTAGC

Splint<sub>DZ</sub>: TCGTTGTAGCTAGCCT

The DNAzyme function of L43<sub>DZ</sub> was 10-23 (reported in Wang, B., Cao, L., Chiuman, W., Li, Y. and Xi, Z. (2010) Probing the function of nucleotides in the catalytic cores of the 8–17 and 10–23 DNAzymes by abasic nucleotide and C3 spacer substitutions. *Biochemistry*, **49**, 7553-7562.).

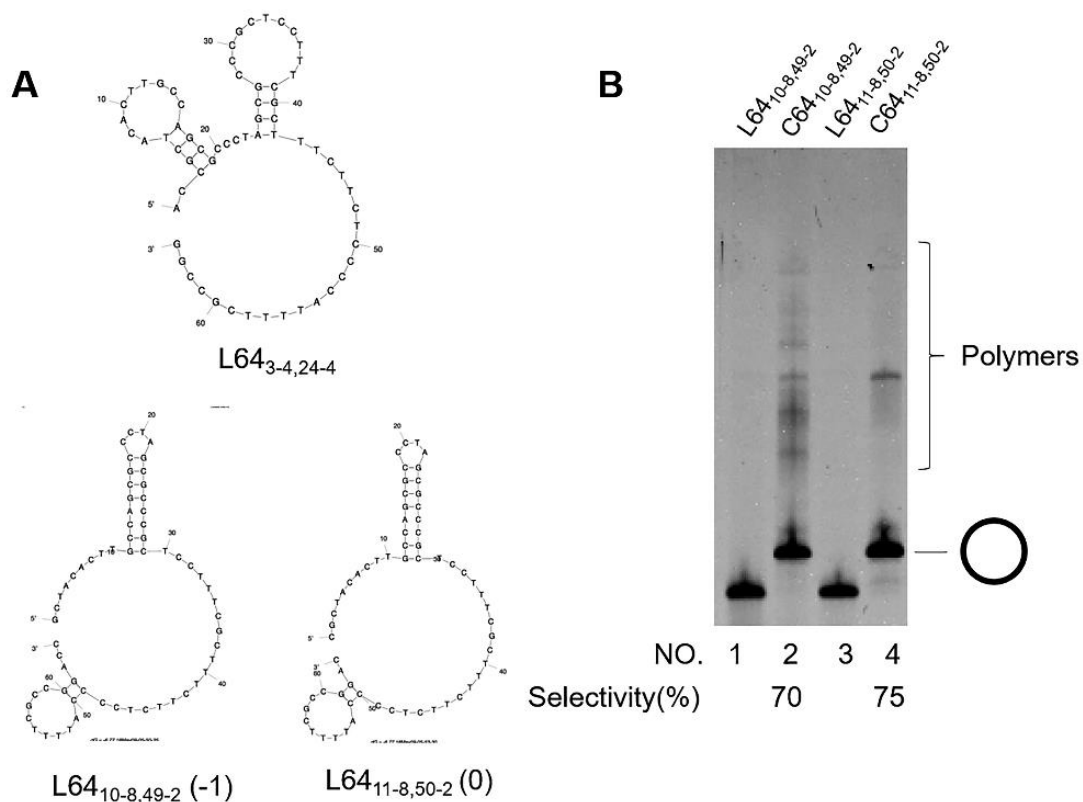

**Figure S3.** Cyclization of L64<sub>10-8,49-2</sub> and L64<sub>11-8,50-2</sub>. (A) The solution structures of L64<sub>10-8,49-2</sub> and L64<sub>11-8,50-2</sub> determined by Mfold calculation. For the purpose of comparison, the structure of L64<sub>3-4,24-4</sub> is also shown. (B) Lane 1, L64<sub>10-8,49-2</sub> without the T4 ligase treatment; lane 2, L64<sub>10-8,49-2</sub> treated with T4 DNA ligase in the presence of 12-nt splint; lane 3, L64<sub>11-8,50-2</sub> without the T4 ligase treatment; lane 4, L64<sub>11-8,50-2</sub> treated with T4 DNA ligase in the presence of 12-nt splint. The conditions for the cyclization: [L-DNA]<sub>0</sub> = 5 μM, [splint]<sub>0</sub> = 10 μM, and 10 U T4 DNA ligase in 1× T4 DNA ligase buffer at 25°C for 12 h.

Sequences of oligonucleotides used here are shown as follows:

L64<sub>10-8,49-2</sub>:

GCTACACTTGCCAGCGCCCTAGCGCCCGCTCCTTTTCGCTTTCTTCTCCCCATTTTCGCCGGACC

L64<sub>11-8,50-2</sub>:

CGTACACTTGCCAGCGCCCTAGCGCCCGCTCCTTTTCGCTTTCTTCTCCCCATTTTCGCCGGAC

Splint<sub>10-8</sub>: TGTAGCGGTCCG

Splint<sub>11-8</sub>: GTAGCGGTCCGG

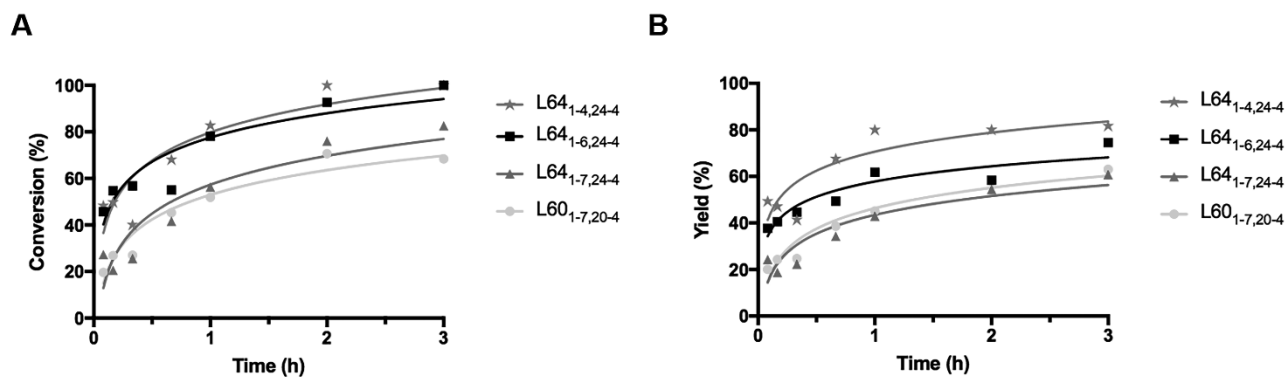

**Figure S4.** Comparison of the reaction conversion and yield of monomeric cyclic ring by T4 ligase. (A) The total amounts of DNA, consumed in the presence of T4 (by both intramolecular and intermolecular ligation), are plotted as a function of reaction time. In (B), the yield of DNA ring is shown as a function of reaction time. Reaction conditions:  $[I\text{-DNA}]_0 = 5 \mu\text{M}$ ,  $[\text{splint}]_0 = 10 \mu\text{M}$ , and 10 U T4 DNA ligase in  $1\times$  T4 DNA ligase buffer,  $25^\circ\text{C}$ .

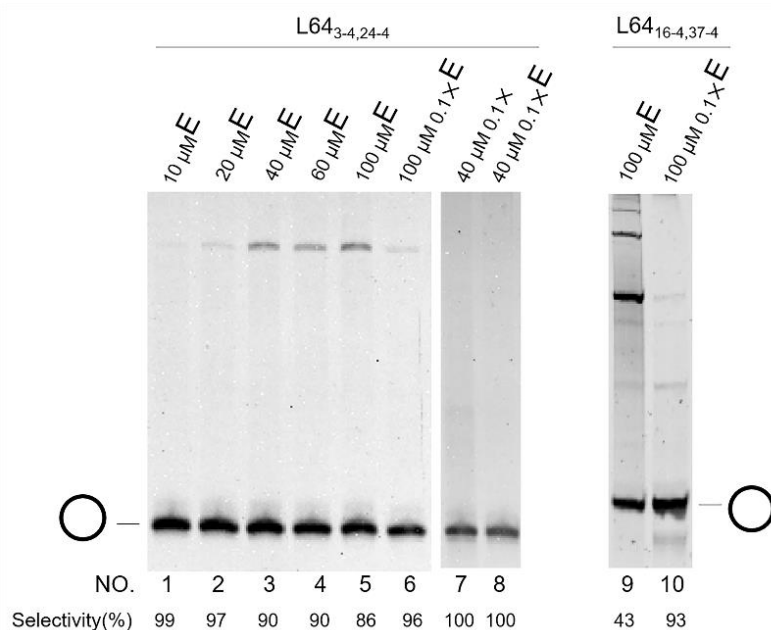

**Figure S5.** Combination of terminal hairpin strategy with diluted buffer strategy for highly selective cyclization in preparative scale. Lane 1, T4 reaction at  $[L64_{3-4,24-4}] = 10 \mu\text{M}$  with Exonuclease I in  $1\times$  T4 DNA ligase buffer; lane 2,  $20 \mu\text{M}$ ; lane 3,  $40 \mu\text{M}$ ; lane 4,  $60 \mu\text{M}$ ; lane 5,  $100 \mu\text{M}$ ; lane 6,  $[L64_{3-4,24-4}] = 10 \mu\text{M}$  with Exonuclease I,  $0.1\times$  T4 DNA ligase buffer was used in place of  $1\times$  T4 buffer; In lane 7,  $[L64_{3-4,24-4}] = 40 \mu\text{M}$  in  $0.1\times$  T4 DNA ligase buffer; lane 8, the products in lane 7 with Exonuclease I; lane 9,  $L64_{16-4,37-4}$  with no terminal hairpin was used,  $[L64_{16-4,37-4}] = 100 \mu\text{M}$  with  $1\times$  T4 DNA ligase buffer; lane 10,  $[L64_{16-4,37-4}] = 100 \mu\text{M}$  with  $0.1\times$  T4 DNA ligase buffer.  $[I\text{-DNA}]_0/[splint]_0 = 1/2$ , and 10 U T4 DNA ligase  $25^\circ\text{C}$ .



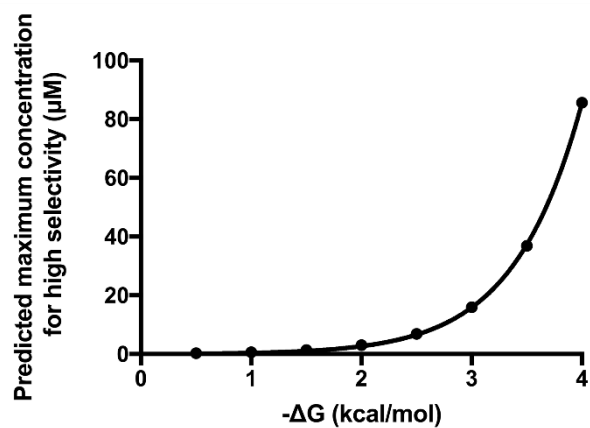

**Figure S6.** Predicted maximum concentration for high selectivity (>85%) by  $\Delta G$  (the concentration of the active species is set as 0.1  $\mu\text{M}$ ). The Equilibrium constant ( $K$ ) and concentration of hairpin structure and its linear structure was calculated by equations (1) and (2):

$$\Delta G = -RT \ln K \quad (1)$$

$$K = e^{-\frac{\Delta G}{RT}} = \frac{c_{\text{max}} - c_{\text{linear}}}{c_{\text{linear}}} \quad (2)$$
